# Supplementary material for: QuantiNemo 2: a Swiss knife to simulate complex demographic and genetic scenarios, forward and backward in time
Source: PubMed Central journal article supplement — Bioinformatics. 2018 Aug 23;35(5):886–8. doi: 10.1093/bioinformatics/bty737 (PMC6394393; doi:10.1093/bioinformatics/bty737), 2018-08-23
Supplement: bty737_appendix.pdf [file bty737_appendix.pdf]

In this appendix, we provide a list of studies where quantiNemo 1 was used. This prove that quantiNemo is a tool of reference in a wide variety of topics and that it needs to be updated in order to remain such a tool since research focus evolves constantly.

- power of  $F_{ST}$  outlier tests, and  $F_{ST} - Q_{ST}$  comparisons Narum and Hess (2011); Edelaar and Björklund (2011); Cubry *et al.* (2017)
- recommended for genome mapping in wild populations Slate *et al.* (2010)
- quantitative genetics and gene mapping Yoder and Tiffin (2018); Gompert (2016)
- inference of species demography Frank *et al.* (2011); Antoniazza *et al.* (2014); Kanitz *et al.* (2018)
- test of introgression Hess *et al.* (2011); Lindtke *et al.* (2012); Pajkovic *et al.* (2014); De La Torre *et al.* (2015)
- evolution of sex determinism Grossen *et al.* (2011); Blaser *et al.* (2011); Saleh *et al.* (2012); Grossen *et al.* (2012)
- test of the effect of mating systems Bazin *et al.* (2014)
- test of the effect of domestication Mäkinen *et al.* (2015)
- effect of climate change on demography Prates *et al.* (2016)
- effect of environmental pressure on demography Frey *et al.* (2016)
- effect of migration on genetic diversity Steinbach *et al.* (2018)

## References

- Antoniazza, S. *et al.* (2014). Natural selection in a postglacial range expansion: the case of the colour cline in the European barn owl. *Molecular Ecology*, **23**(22), 5508–5523.
- Bazin, E. *et al.* (2014). The effect of mating system on invasiveness: some genetic load may be advantageous when invading new environments. *Biological Invasions*, **16**(4), 875–886.
- Blaser, O. *et al.* (2011). On the Maintenance of Sex Chromosome Polymorphism by Sex-Antagonistic Selection. *American naturalist*, **178**(4), 515–524.
- Cubry, P. *et al.* (2017). Generalization of the qst framework in hierarchically structured populations: Impacts of inbreeding and dominance. *Molecular Ecology Resources*, **17**(6), e76–e83.
- De La Torre, A. *et al.* (2015). Genetic architecture and genomic patterns of gene flow between hybridizing species of *Picea*. *Heredity*, **115**(2), 153–164.
- Edelaar, P. and Björklund, M. (2011). If  $F_{ST}$  does not measure neutral genetic differentiation, then comparing it with  $Q_{ST}$  is misleading. Or is it? *Molecular Ecology*, **20**(9), 1805–1812.
- Frank, B. M. *et al.* (2011). A review of ecological models for brown trout: towards a new demogenetic model. *Ecology of freshwater fish*, **20**(2), 167–198.
- Frey, D. *et al.* (2016). Parallel declines in species and genetic diversity driven by anthropogenic disturbance: a multispecies approach in a french atlantic dune system. *Evolutionary Applications*, **9**(3), 479–488.
- Gompert, Z. (2016). Bayesian inference of selection in a heterogeneous environment from genetic timeseries data. *Molecular Ecology*, **25**(1), 121–134.
- Grossen, C. *et al.* (2011). Temperature-dependent turnovers in sex-determination mechanisms: a quantitative model. *Evolution*, **65**(1), 64–78.
- Grossen, C. *et al.* (2012). The evolution of xy recombination: sexually antagonistic selection versus deleterious mutation load. *Evolution*, **66**(10), 3155–3166.
- Hess, J. E. *et al.* (2011). Introgressive hybridization among major Columbia River Chinook salmon (*Oncorhynchus tshawytscha*) lineages within the Klickitat River due to hatchery practices. *Canadian journal of fisheries and aquatic sciences*, **68**(11), 1876–1891.
- Kanitz, R. *et al.* (2018). Complex genetic patterns in human arise from a simple range-expansion model over continental landmasses. *PLOS ONE*, **13**(2), 1–16.
- Lindtke, D. *et al.* (2012). Recombinant hybrids retain heterozygosity at many loci: new insights into the genomics of reproductive isolation in *Populus*. *Molecular ecology*, **21**(20), 5042–5058.
- Mäkinen, H. *et al.* (2015). Population genomic analyses of early-phase Atlantic Salmon (*Salmo salar*) domestication/captive breeding. *Evolutionary Applications*, **8**(1), 93–107.
- Narum, S. R. and Hess, J. E. (2011). Comparison of  $F_{ST}$  outlier tests for SNP loci under selection. *Molecular Ecology Resources*, **11**, 184–194.
- Pajkovic, M. *et al.* (2014). Wheat alleles introgress into selfing wild relatives: empirical estimates from approximate Bayesian computation in *Aegilops triuncialis*. *Molecular ecology*, **23**(20), 5089–5101.
- Prates, I. *et al.* (2016). Inferring responses to climate dynamics from historical demography in neotropical forest lizards. *Proceedings of the national academy of sciences of the united states of america*, **113**(29), 7978–7985.
- Saleh, D. *et al.* (2012). Sex at the origin: an Asian population of the rice blast fungus *Magnaporthe oryzae* reproduces sexually. *Molecular ecology*, **21**(6), 1330–1344.
- Slate, J. *et al.* (2010). Genome mapping in intensively studied wild vertebrate populations. *Trends in genetics*, **26**(6), 275–284.
- Steinbach, P. *et al.* (2018). Rare migrants suffice to maintain high genetic diversity in an introduced island population of roe deer (*Capreolus capreolus*): Evidence from molecular data and simulations. *Mammalian biology*, **88**, 64–71.
- Yoder, J. B. and Tiffin, P. (2018). Effects of Gene Action, Marker Density, and Timing of Selection on the Performance of Landscape Genomic Scans of Local Adaptation. *Journal of heredity*, **109**(1), 16–28.
- AGA Presidential Symposium on Local Adaptation - From Phenotype to Genotype to Fitness, Asilomar, CA, JUL, 2016.
